# Supplementary material
Source: PubMed Central journal article supplement (PMC3928671)
Supplement: NIHMS537539-supplement-1_si_001.pdf [file NIHMS537539-supplement-1_si_001.pdf]

Supporting Information for

**Magic Angle Spinning NMR Reveals Sequence-Dependent Structural Plasticity, Dynamics, and the Spacer Peptide 1 Conformation in HIV-1 Capsid Protein Assemblies**

*Yun Han<sup>1,2#</sup>, Guangjin Hou<sup>1,2#</sup>, Christopher L. Suiter<sup>1,2</sup>, Jinwoo Ahn<sup>1,3</sup>, In-Ja L. Byeon<sup>1,3</sup>, Andrew S. Lipton<sup>4</sup>, Sarah Burton<sup>4</sup>, Ivan Hung<sup>5</sup>, Peter L. Gor'kov<sup>5</sup>, Zhehong Gan<sup>5</sup>, William Brey<sup>5</sup>, David Rice<sup>6</sup>, Angela M. Gronenborn<sup>1,3</sup>, and Tatyana Polenova<sup>1,2\*</sup>*

<sup>1</sup>Department of Chemistry and Biochemistry, University of Delaware, Newark, DE 19716, United States;

<sup>2</sup>Pittsburgh Center for HIV Protein Interactions, University of Pittsburgh School of Medicine, Pittsburgh, PA 15261, United States;

<sup>3</sup>Department of Structural Biology, University of Pittsburgh School of Medicine, 3501 Fifth Ave., Pittsburgh, PA 15261, United States;

<sup>4</sup>Environmental Molecular Sciences Laboratory, Pacific Northwest National Laboratory, Richland, WA, 99352, United States;

<sup>5</sup>Nuclear Magnetic Resonance Program, National High Magnetic Field Laboratory, Tallahassee, FL, 32310, United States;

<sup>6</sup>Agilent Technologies, Inc., 5301 Stevens Creek Boulevard, Santa Clara, CA 95051; United States.

<sup>#</sup>These authors contributed equally to this work

E-mail: [tpolenov@udel.edu](mailto:tpolenov@udel.edu)

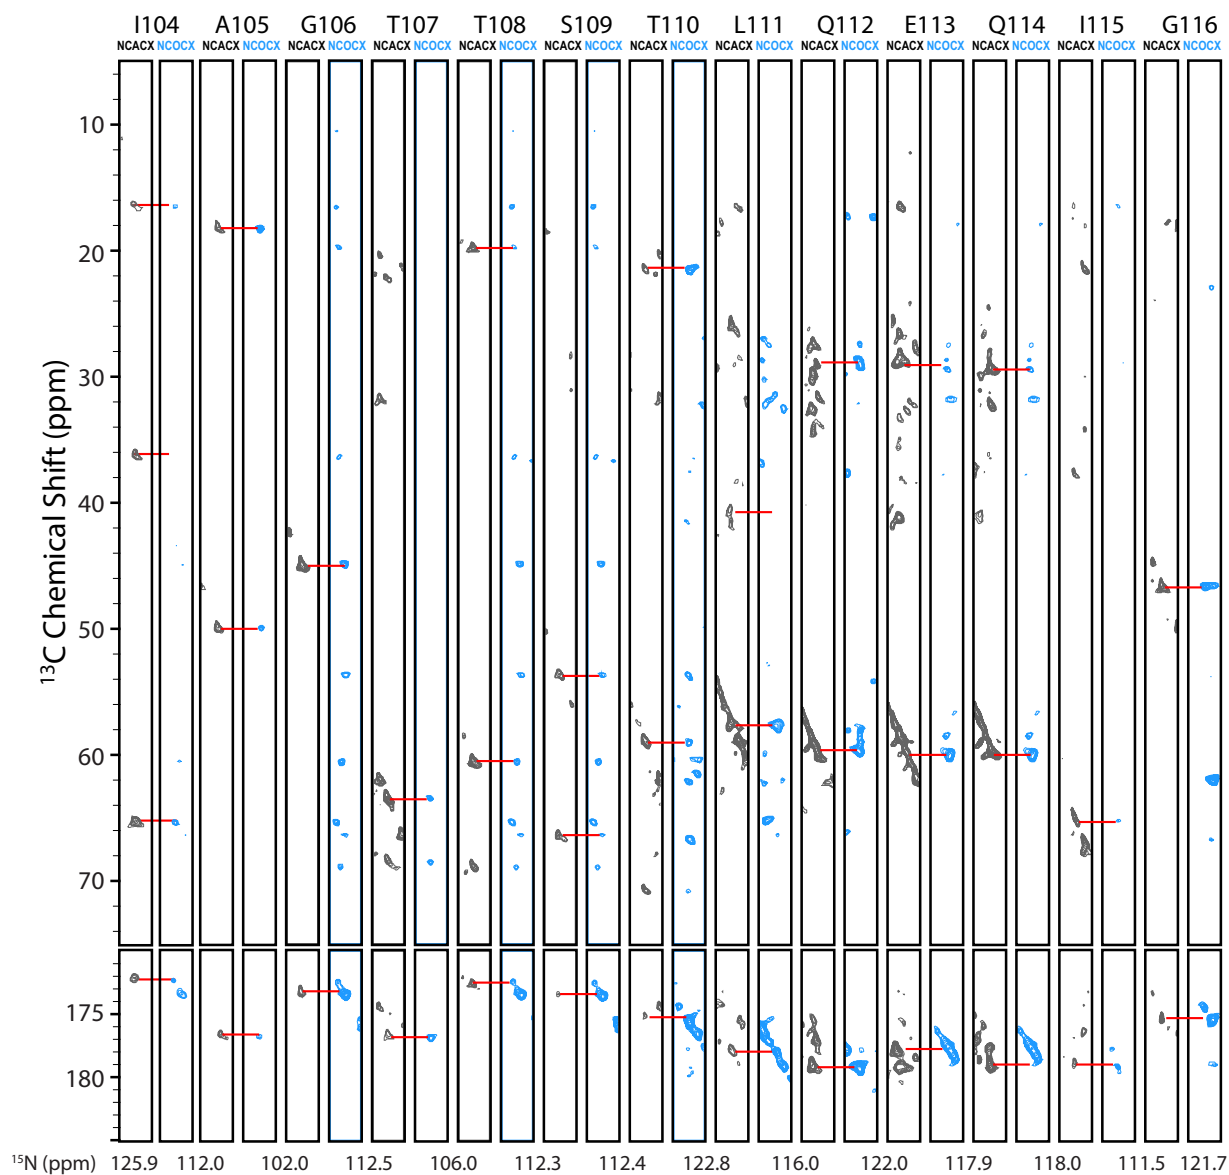

**Figure S1.** Backbone walk for the R100-G116 stretch of residues of tubular assemblies of U- $^{13}\text{C}$ ,  $^{15}\text{N}$  HIV-1 CA WT (HXB2 strain) generated from the 3D NCACX and NCOCX spectra acquired at 21.1 T and 4 °C. The acquisition parameters are given in the Supporting Information.

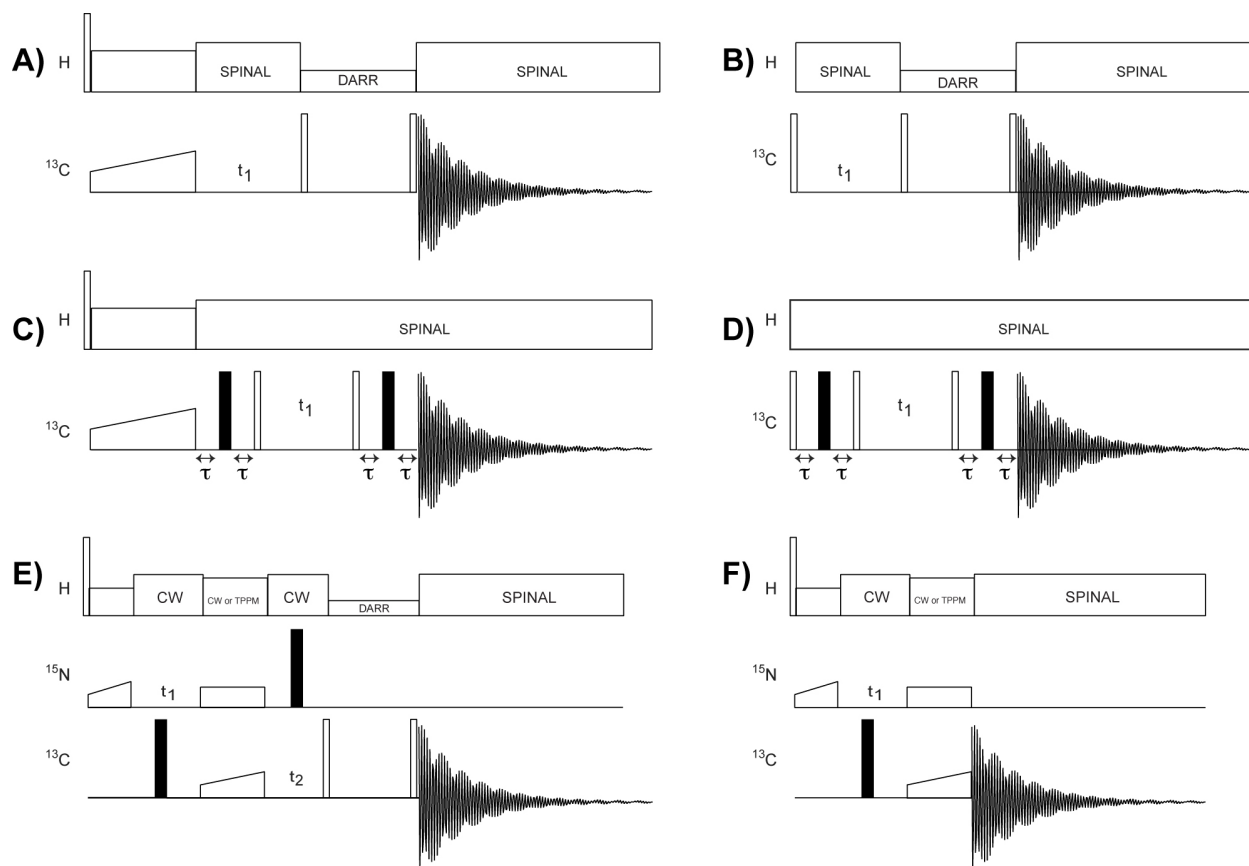

**Figure S2.** Diagrams of pulse sequences used in this work: A) CP-DARR; B) direct-DARR; C) CP-INADEQUATE; D) direct-INADEQUATE; E) NCACX/NCOCX; and F) NCA.

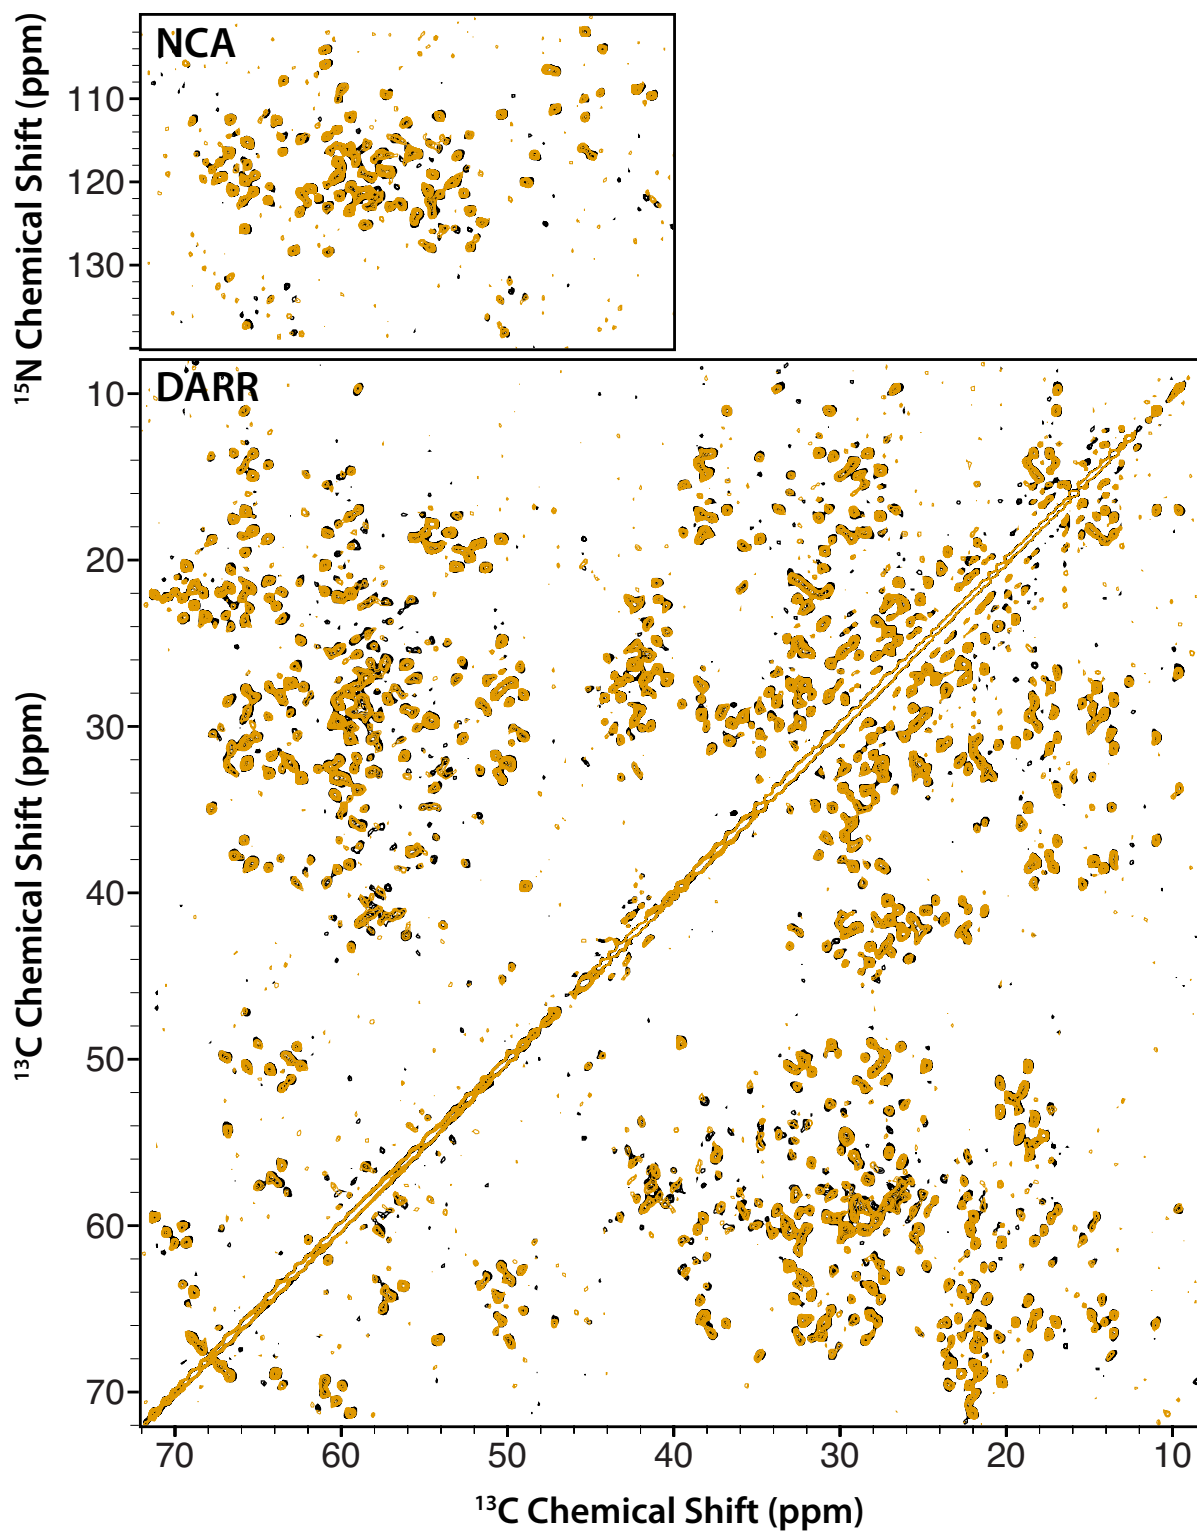

**Figure S3.** The superposition of the NCA (top) and aliphatic region of CP-DARR (bottom) spectra of tubular assemblies acquired at 19.9 T and 4 °C. CA NL4-3 A92E is in orange and CA-SP1 NL4-3 A92E is in black. The DARR mixing time was 50 ms. The acquisition parameters for the spectra of U-<sup>13</sup>C, <sup>15</sup>N HIV-1 CA-SP1 tubular assemblies are given in Table S1.

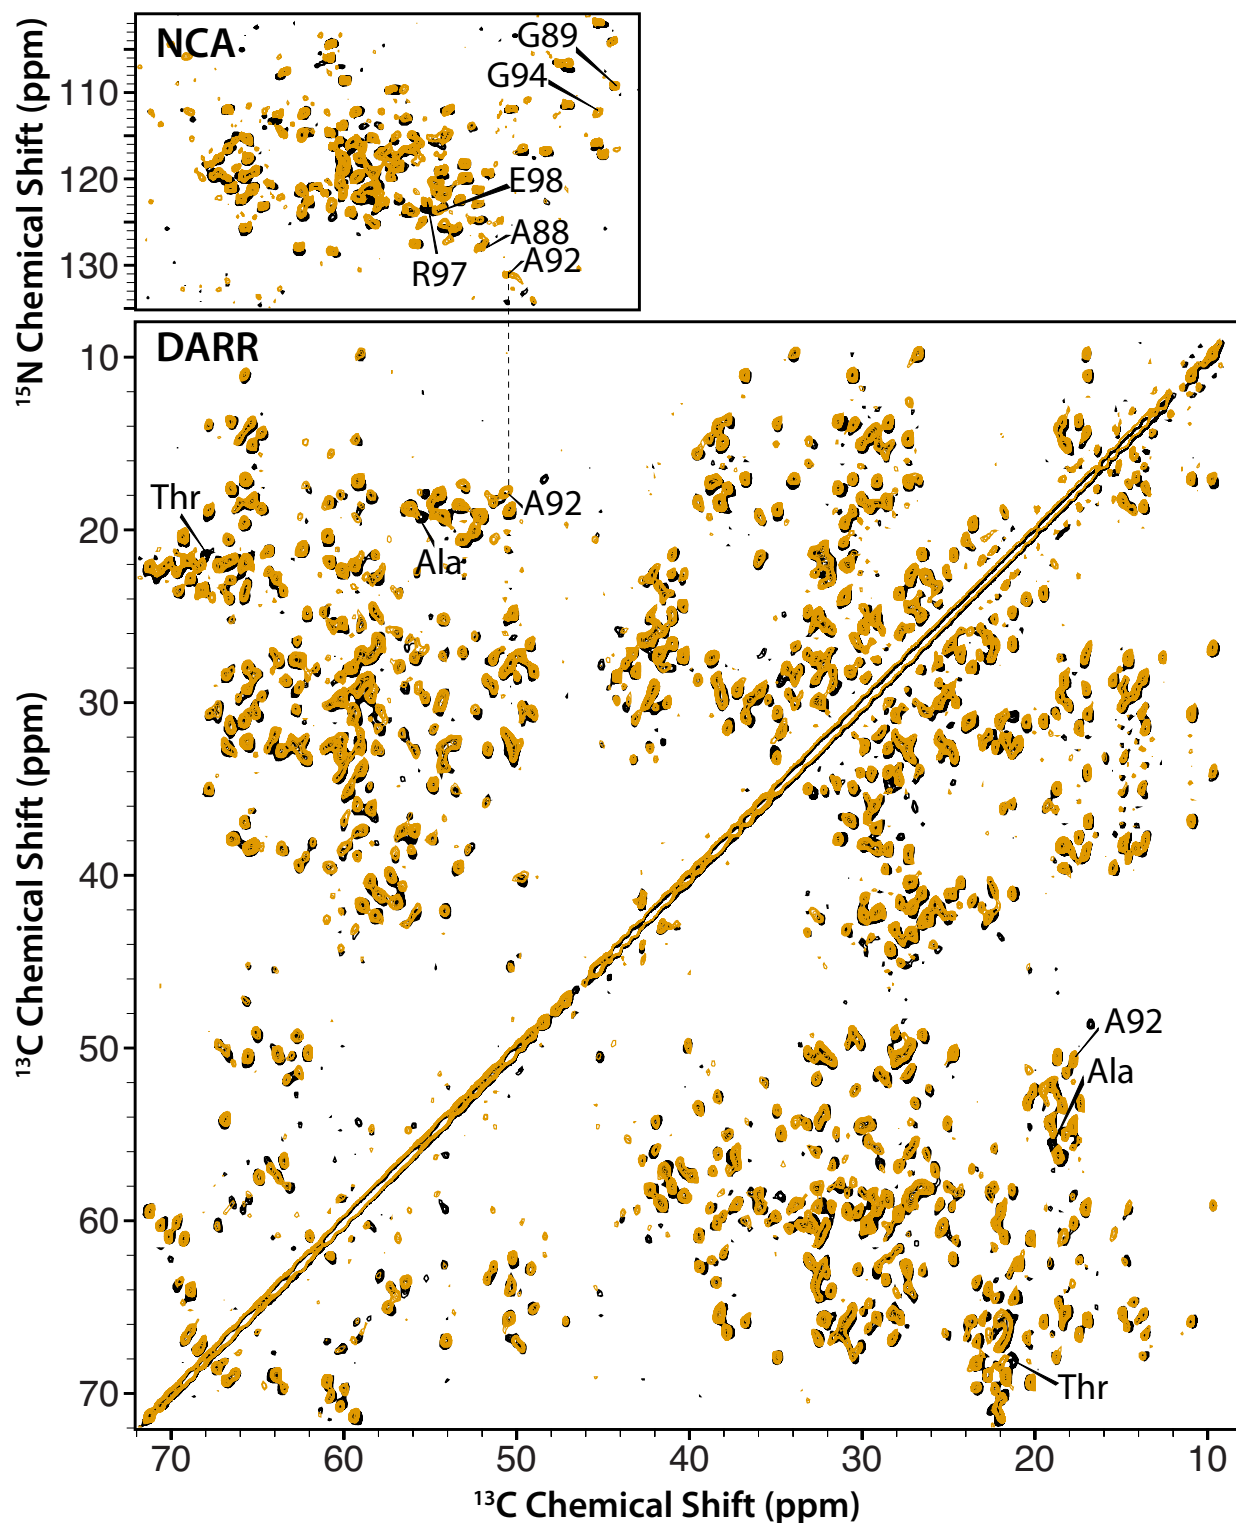

**Figure S4.** The superposition comparison of the NCA (top) aliphatic region of CP-DARR (bottom) spectra acquired at 21.1 T and 4 °C. CA HXB2 is in orange and CA-SP1 HXB2 is in black. The DARR mixing time was 50ms. The acquisition parameters for the spectra of U- $^{13}\text{C}$ ,  $^{15}\text{N}$  HIV-1 CA-SP1 tubular assemblies are given in Table S1.

**Table S1.** Acquisition and processing parameters for the solid-state NMR experiments in tubular assemblies of CA and CA-SP1.

| Experiment                                                     | Acquisition |                                              |                                       | Processing |                                                               |                                                                                                              |
|----------------------------------------------------------------|-------------|----------------------------------------------|---------------------------------------|------------|---------------------------------------------------------------|--------------------------------------------------------------------------------------------------------------|
|                                                                | $\omega_3$  | $\omega_2$                                   | $\omega_1$                            | $\omega_3$ | $\omega_2$                                                    | $\omega_1$                                                                                                   |
| <b>19.9 T</b>                                                  |             |                                              |                                       |            |                                                               |                                                                                                              |
| U- <sup>13</sup> C, <sup>15</sup> N-CA, NL4-3 A92E variant     |             |                                              |                                       |            |                                                               |                                                                                                              |
| CP-DARR<br>( $\tau_{\text{mix}}=50$ ms)                        |             | 1024 complex;<br>SW = 64 kHz,<br>128 scans   | 512 real, SW =<br>45 kHz              |            | 30-degree sinebell; Lorentzian-<br>to-Gaussian transformation | forward linear prediction of 512<br>points; 30-degree sinebell;<br>Lorentzian-to-Gaussian<br>transformation  |
| direct-<br>DARR( $\tau_{\text{mix}}=50$<br>ms)                 |             | 1024 complex;<br>SW =64 kHz,<br>192 scans    | 400 real, SW =<br>45 kHz              |            | 30-degree sinebell; Lorentzian-<br>to-Gaussian transformation | forward linear prediction of 512<br>points; 30-degree sinebell;<br>Lorentzian-to-Gaussian<br>transformation  |
| NCACX                                                          |             | 1024 complex;<br>SW =85.2 kHz,<br>2896 scans | 64 complex;<br>(States) SW=6.5<br>kHz |            | 30-degree sinebell; Lorentzian-<br>to-Gaussian transformation | forward linear prediction of 64<br>points; 30-degree sinebell;<br>Lorentzian-to-Gaussian<br>transformation   |
| NCA                                                            |             | 1024 complex;<br>SW =85.2 kHz,<br>320 scans  | 44 complex;<br>(TPPI) SW=6.5<br>kHz   |            | 30-degree sinebell; Lorentzian-<br>to-Gaussian transformation | forward linear prediction of 128<br>points; 30-degree sinebell;<br>Lorentzian-to-Gaussian<br>transformation  |
| NCOCX                                                          |             | 1024 complex;<br>SW =64 kHz,<br>1360 scans   | 40 complex;<br>(TPPI) SW=5<br>kHz     |            | 30-degree sinebell; Lorentzian-<br>to-Gaussian transformation | forward linear prediction of 128<br>points; 30-degree sinebell;<br>Lorentzian-to-Gaussian<br>transformation  |
| CP-<br>INADEQUATE                                              |             | 1024 complex;<br>SW =64 kHz,<br>416 scans    | 400 real; (TPPI)<br>SW=81 kHz         |            | 60-degree sinebell; Lorentzian-<br>to-Gaussian transformation | forward linear prediction of 1024<br>points; 60-degree sinebell;<br>Lorentzian-to-Gaussian<br>transformation |
| INADEQUATE                                                     |             | 1024 complex;<br>SW =64 kHz,<br>1376 scans   | 400 real; (TPPI)<br>SW=81 kHz         |            | 60-degree sinebell; Lorentzian-<br>to-Gaussian transformation | forward linear prediction of 1024<br>points; 60-degree sinebell;<br>Lorentzian-to-Gaussian<br>transformation |
| U- <sup>13</sup> C, <sup>15</sup> N-CA-SP1, NL4-3 A92E variant |             |                                              |                                       |            |                                                               |                                                                                                              |
| CP-DARR<br>( $\tau_{\text{mix}}=50$ ms)                        |             | 1024 complex;<br>SW = 64 kHz,<br>128 scans   | 512 real, SW =<br>45 kHz              |            | 30-degree sinebell; Lorentzian-<br>to-Gaussian transformation | forward linear prediction of 512<br>points; 30-degree sinebell;<br>Lorentzian-to-Gaussian<br>transformation  |

|                                         |                                        |                                 |  |                                                           |                                                                                                     |
|-----------------------------------------|----------------------------------------|---------------------------------|--|-----------------------------------------------------------|-----------------------------------------------------------------------------------------------------|
| direct-DARR( $\tau_{\text{mix}}=50$ ms) | 1024 complex; SW =64 kHz, 192 scans    | 400 real, SW = 45 kHz           |  | 30-degree sinebell; Lorentzian-to-Gaussian transformation | forward linear prediction of 512 points; 30-degree sinebell; Lorentzian-to-Gaussian transformation  |
| NCACX                                   | 1024 complex; SW =85.2 kHz, 2048 scans | 40 complex; (States) SW=6.5 kHz |  | 30-degree sinebell; Lorentzian-to-Gaussian transformation | forward linear prediction of 64 points; 30-degree sinebell; Lorentzian-to-Gaussian transformation   |
| NCA                                     | 1024 complex; SW =64 kHz, 320 scans    | 44 complex; (states) SW=6.5 kHz |  | 30-degree sinebell; Lorentzian-to-Gaussian transformation | forward linear prediction of 128 points; 30-degree sinebell; Lorentzian-to-Gaussian transformation  |
| NCOCX                                   | 1024 complex; SW =85 kHz, 2048 scans   | 40 complex; (TPPI) SW=65 kHz    |  | 30-degree sinebell; Lorentzian-to-Gaussian transformation | forward linear prediction of 128 points; 30-degree sinebell; Lorentzian-to-Gaussian transformation  |
| CP-INADEQUATE                           | 1024 complex; SW =64 kHz, 512 scans    | 400 real; (TPPI) SW=81 kHz      |  | 60-degree sinebell; Lorentzian-to-Gaussian transformation | forward linear prediction of 1024 points; 60-degree sinebell; Lorentzian-to-Gaussian transformation |
| INADEQUATE                              | 1024 complex; SW =64 kHz, 1376 scans   | 400 real; (TPPI) SW=81 kHz      |  | 60-degree sinebell; Lorentzian-to-Gaussian transformation | forward linear prediction of 1024 points; 60-degree sinebell; Lorentzian-to-Gaussian transformation |

### 21.1 T

U-<sup>13</sup>C, <sup>15</sup>N-CA, HXB2 variant

|                                      |                                       |                          |               |                                                           |                                                                                                    |                                                                                                   |
|--------------------------------------|---------------------------------------|--------------------------|---------------|-----------------------------------------------------------|----------------------------------------------------------------------------------------------------|---------------------------------------------------------------------------------------------------|
| CP-DARR ( $\tau_{\text{mix}}=50$ ms) | 1536 complex; SW =100 kHz, 96 scans   | 400 real, SW = 45 kHz    |               | 30-degree sinebell; Lorentzian-to-Gaussian transformation | forward linear prediction of 400 points; 30-degree sinebell; Lorentzian-to-Gaussian transformation |                                                                                                   |
| NCA                                  | 1024 complex; SW =100 kHz, 360 scans  | 96 real; (TPPI) SW=7 kHz |               | 30-degree sinebell; Lorentzian-to-Gaussian transformation | forward linear prediction of 256 points; 30-degree sinebell; Lorentzian-to-Gaussian transformation |                                                                                                   |
| NCACX                                | 1024 complex; SW =100 kHz, 1200 scans | 64 real; (TPPI) SW=5 kHz |               | 30-degree sinebell; Lorentzian-to-Gaussian transformation | forward linear prediction of 64 points; 30-degree sinebell; Lorentzian-to-Gaussian transformation  |                                                                                                   |
| NCACX (1)                            | 1024 complex;                         | 42 real; (TPPI)          | 40 real; SW=7 | 60-degree sinebell;                                       | 60-degree sinebell; Lorentzian-to-Gaussian transformation                                          | forward linear prediction of 64 points; 60-degree sinebell; Lorentzian-to-Gaussian transformation |

|                   |                                             |                                             |                               |                                                                 |                                                                                                            |                                                                                                             |
|-------------------|---------------------------------------------|---------------------------------------------|-------------------------------|-----------------------------------------------------------------|------------------------------------------------------------------------------------------------------------|-------------------------------------------------------------------------------------------------------------|
|                   | SW =100 kHz,<br>1200 scans                  | SW=5 kHz                                    | kHz                           | Lorentzian-to-Gaussian<br>transformation                        | to-Gaussian transformation                                                                                 | points; 60-degree sinebell;<br>Lorentzian-to-Gaussian<br>transformation                                     |
| NCACX (2)         | 1024 complex;<br>SW =100 kHz,<br>144 scans  | 42 real; (TPPI)<br>SW=5 kHz                 | 40 real; SW=7<br>kHz          | 90-degree sinebell;<br>Lorentzian-to-Gaussian<br>transformation | forward linear prediction of 64<br>points; 90-degree sinebell;<br>Lorentzian-to-Gaussian<br>transformation | forward linear prediction of 64<br>points; 90-degree sinebell;<br>Lorentzian-to-Gaussian<br>transformation  |
| NCOCX (1)         | 1024 complex;<br>SW =100 kHz,<br>1200 scans | 43 real; (TPPI)<br>SW=5 kHz                 | 24 real; SW=5<br>kHz          | 60-degree sinebell;<br>Lorentzian-to-Gaussian<br>transformation | forward linear prediction of 64<br>points; 60-degree sinebell;<br>Lorentzian-to-Gaussian<br>transformation | forward linear prediction of 64<br>points; 60-degree sinebell;<br>Lorentzian-to-Gaussian<br>transformation  |
| NCOCX (2)         | 1024 complex;<br>SW =100 kHz,<br>1200 scans | 43 real; (TPPI)<br>SW=5 kHz                 | 24 real; SW=5<br>kHz          | 90-degree sinebell;<br>Lorentzian-to-Gaussian<br>transformation | forward linear prediction of 64<br>points; 90-degree sinebell;<br>Lorentzian-to-Gaussian<br>transformation | forward linear prediction of 64<br>points; 90-degree sinebell;<br>Lorentzian-to-Gaussian<br>transformation  |
| CP-<br>INADEQUATE |                                             | 1536 complex;<br>SW =100 kHz,<br>400 scans  | 207 real; (TPPI)<br>SW=81 kHz |                                                                 | 60-degree sinebell; Lorentzian-<br>to-Gaussian transformation                                              | forward linear prediction of 512<br>points; 60-degree sinebell;<br>Lorentzian-to-Gaussian<br>transformation |
| INADEQUATE        |                                             | 1536 complex;<br>SW =100 kHz,<br>1200 scans | 240 real; (TPPI)<br>SW=81 kHz |                                                                 | 60-degree sinebell; Lorentzian-<br>to-Gaussian transformation                                              | forward linear prediction of 512<br>points; 60-degree sinebell;<br>Lorentzian-to-Gaussian<br>transformation |

### 21.1 T

U-<sup>13</sup>C, <sup>15</sup>N-CA, HXB2 variant

|                                                |  |                                            |                               |  |                                                               |                                                                                                             |
|------------------------------------------------|--|--------------------------------------------|-------------------------------|--|---------------------------------------------------------------|-------------------------------------------------------------------------------------------------------------|
| CP-DARR<br>( $\tau_{\text{mix}}=50$ ms)        |  | 1536 complex;<br>SW =100 kHz,<br>96 scans  | 400 real, SW =<br>45 kHz      |  | 30-degree sinebell; Lorentzian-<br>to-Gaussian transformation | forward linear prediction of 400<br>points; 30-degree sinebell;<br>Lorentzian-to-Gaussian<br>transformation |
| NCA                                            |  | 1024 complex;<br>SW =100 kHz,<br>128 scans | 80 real; (TPPI)<br>SW=5kHz    |  | 30-degree sinebell; Lorentzian-<br>to-Gaussian transformation | forward linear prediction of 256<br>points; 30-degree sinebell;<br>Lorentzian-to-Gaussian<br>transformation |
| direct-<br>DARR( $\tau_{\text{mix}}=50$<br>ms) |  | 1536 complex;<br>SW =100 kHz,<br>288 scans | 176complex,<br>SW = 45 kHz    |  | 30-degree sinebell; Lorentzian-<br>to-Gaussian transformation | forward linear prediction of 256<br>points; 30-degree sinebell;<br>Lorentzian-to-Gaussian<br>transformation |
| CP-<br>INADEQUATE                              |  | 1536 complex;<br>SW =100 kHz,              | 400 real; (TPPI)<br>SW=81 kHz |  | 60-degree sinebell; Lorentzian-<br>to-Gaussian transformation | forward linear prediction of 1024<br>points; 60-degree sinebell;                                            |



|            |                                             |                               |                                                           |                                                                                                     |
|------------|---------------------------------------------|-------------------------------|-----------------------------------------------------------|-----------------------------------------------------------------------------------------------------|
|            | 384 scans                                   |                               |                                                           | Lorentzian-to-Gaussian transformation                                                               |
| INADEQUATE | 1536 complex;<br>SW =100 kHz,<br>1248 scans | 240 real; (TPPI)<br>SW=81 kHz | 60-degree sinebell; Lorentzian-to-Gaussian transformation | forward linear prediction of 1024 points; 60-degree sinebell; Lorentzian-to-Gaussian transformation |

---
